# Supplementary material
Source: PubMed Central journal article supplement (PMC1764046)

Supplementary material for the paper  
On side-chain conformational entropy of proteins  
Jinfeng Zhang and Jun S. Liu

I. Side-chain entropy versus radius of gyration ( $R_g$ ) and number of contacts ( $N_c$ ) for X-ray protein structures and their decoys of monomeric proteins. Structures with no self-avoiding side-chain conformation are omitted. Natives are represented by red dots and decoys empty green circles. Y-axis is side-chain entropy and x-axis is  $R_g$  and  $N_c$ .

1. 4state\_reduced decoy set

1r69

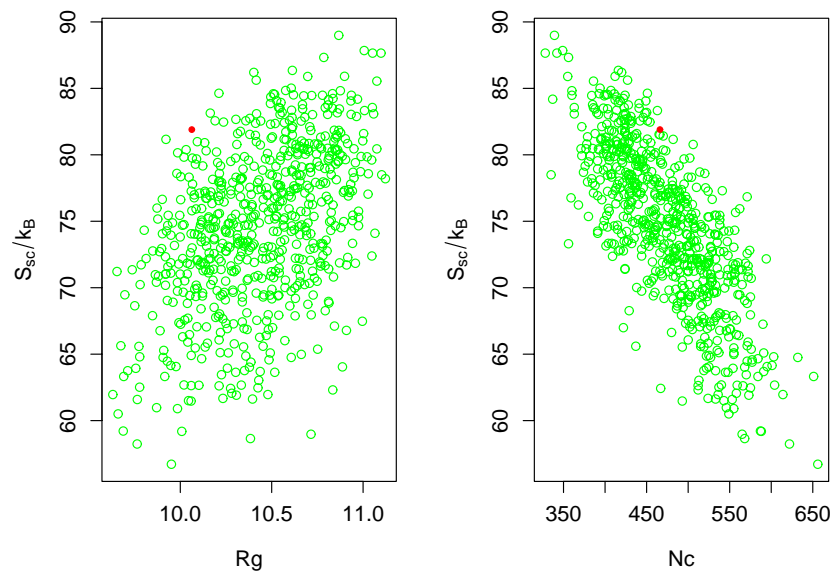

1sn3

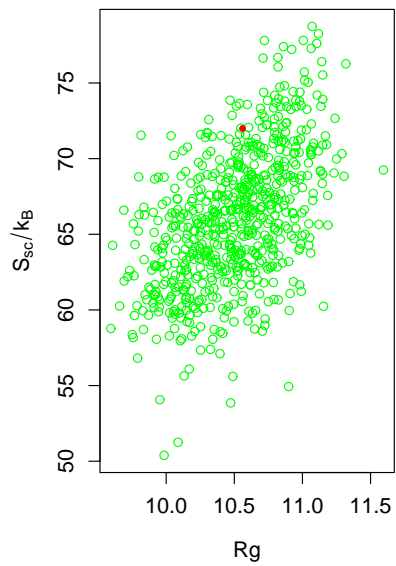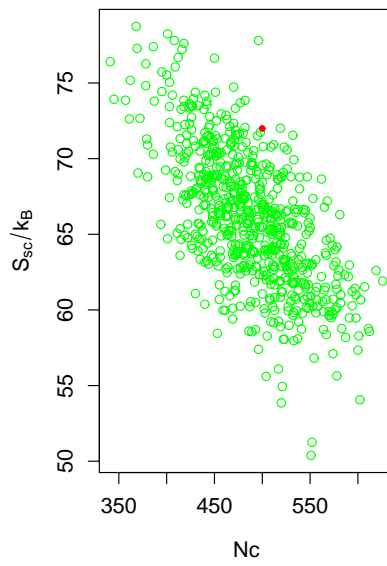

2cro

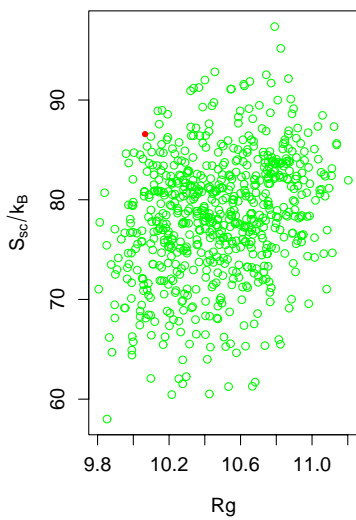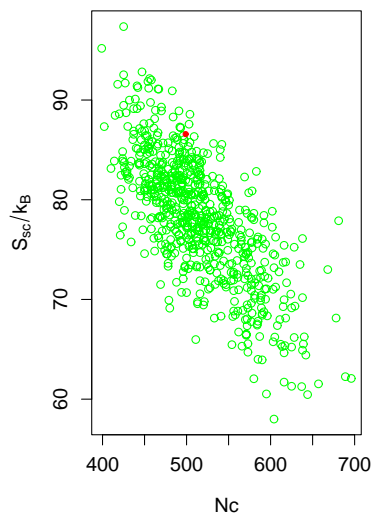

3icb (Metal binding protein)

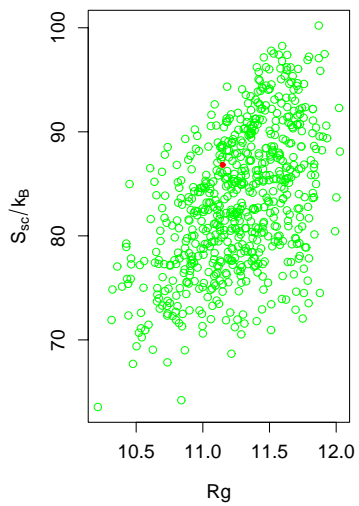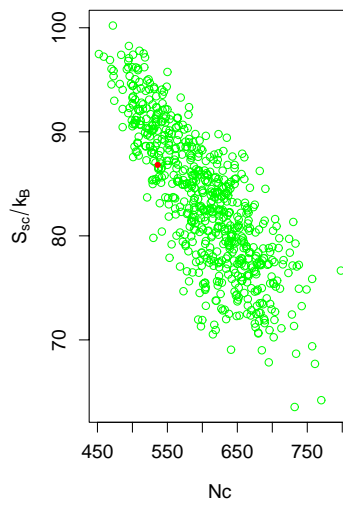

4pti (Protein with disulfide bonds)

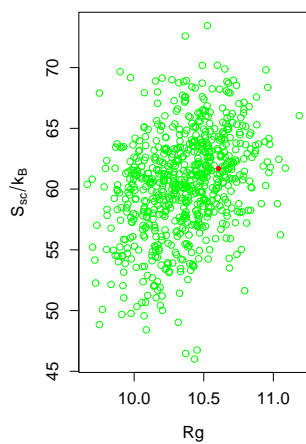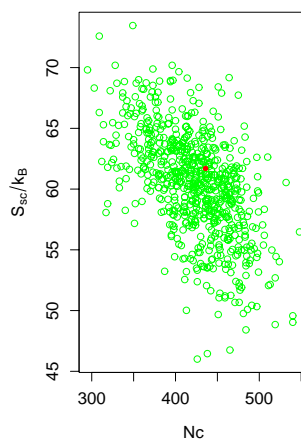

4rxn (Metal binding protein)

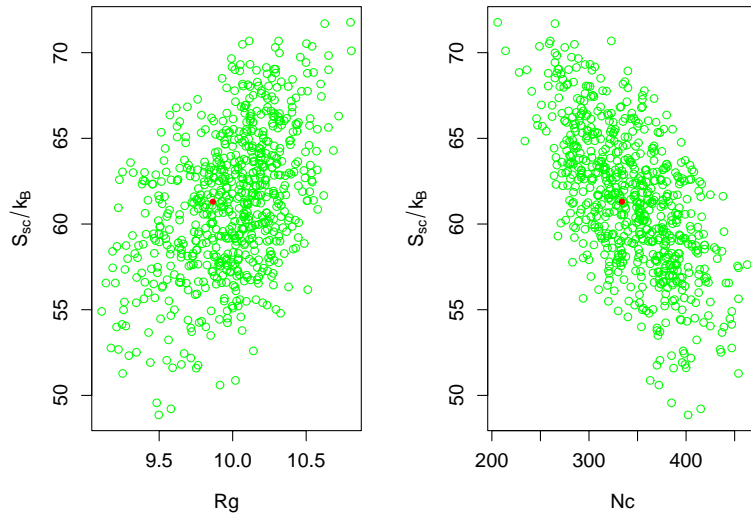

2. fisa

1fc2 (Protein interacting with another protein)

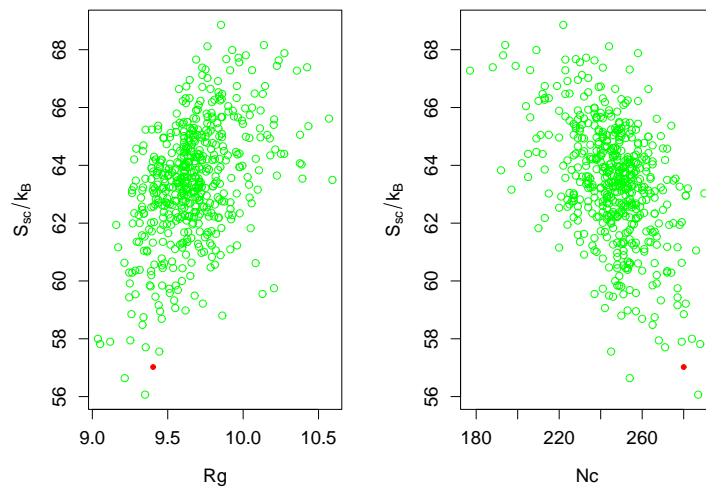

1hdd-C (Protein interacting with another protein)

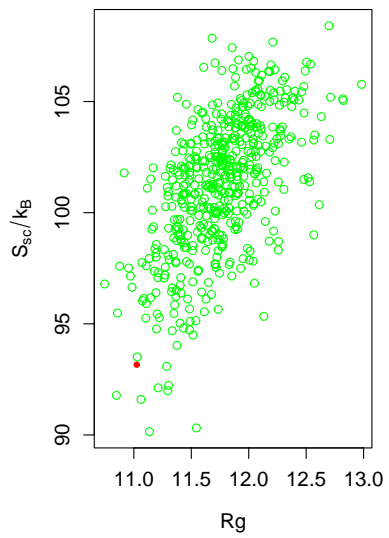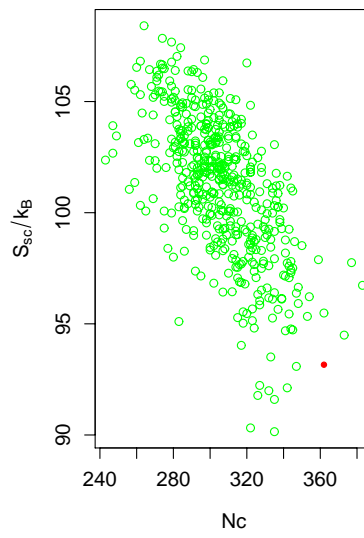

2cro

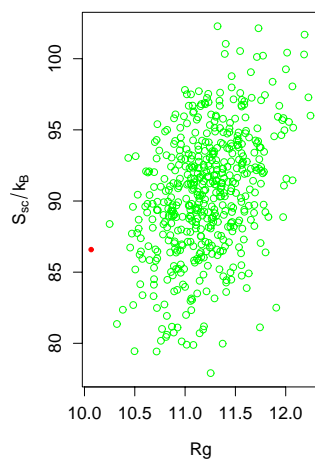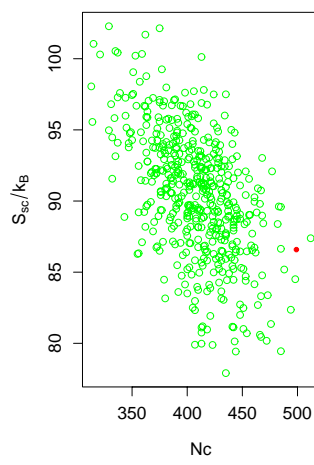

3. fisa\_casp3

1bg8-A (Protein with Disulfide bonds)

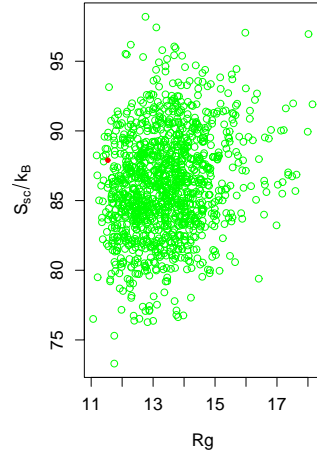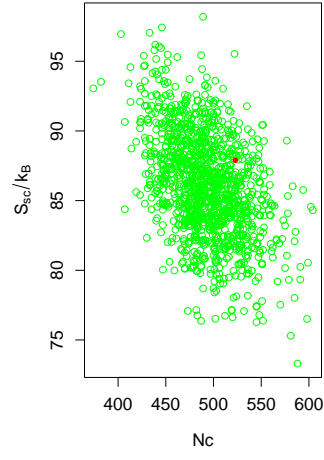

1b10

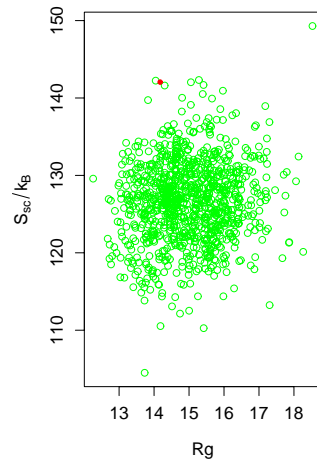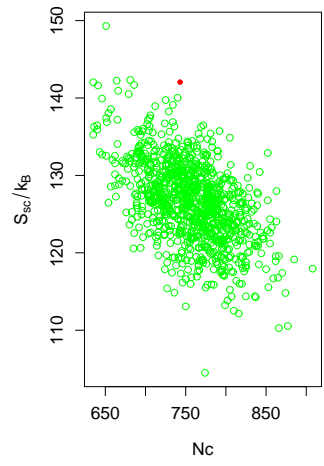

1eh2 (Metal binding protein)

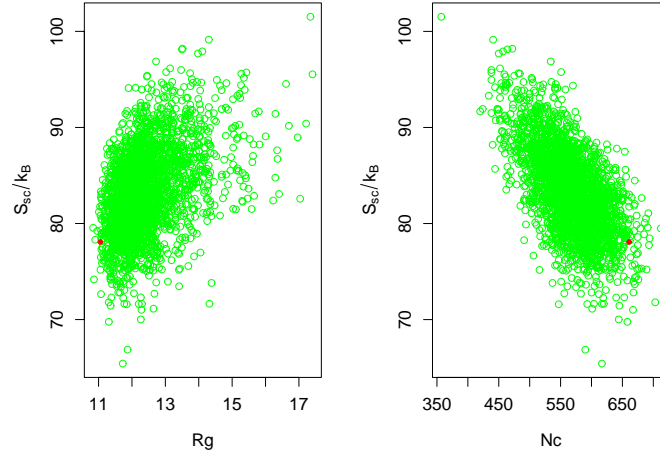

smd3

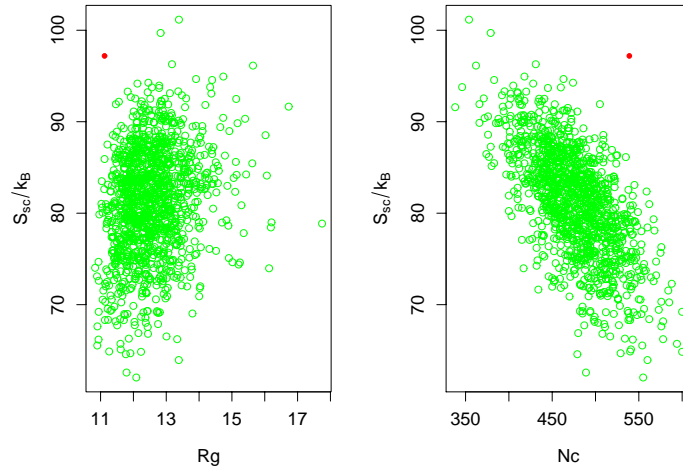

4. lattice\_ssfit

1ctf

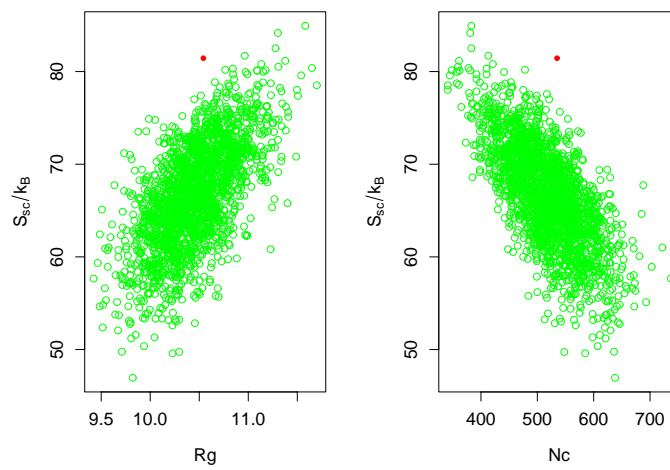

1dkt

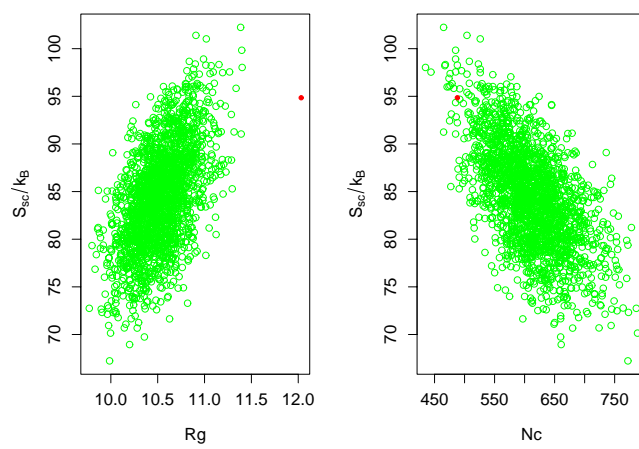

1fca



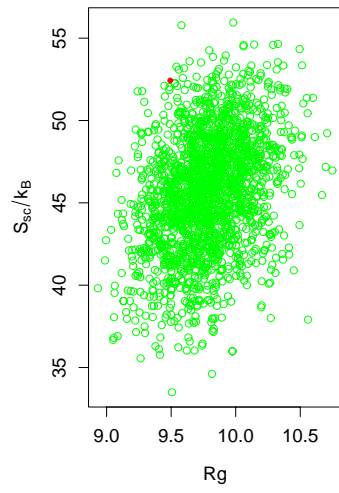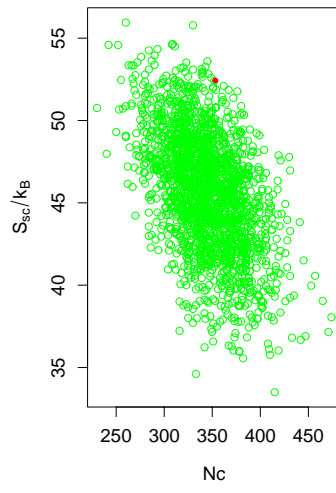

1nkl

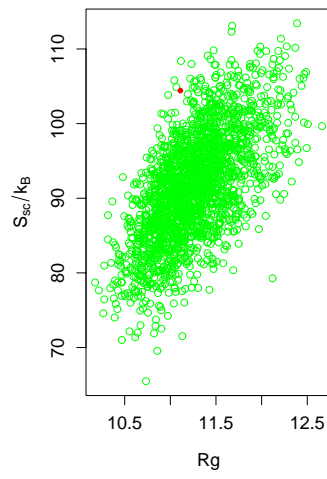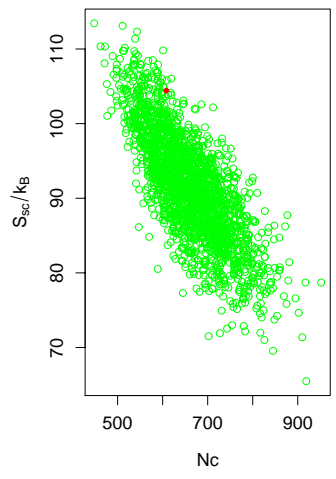

1pgb

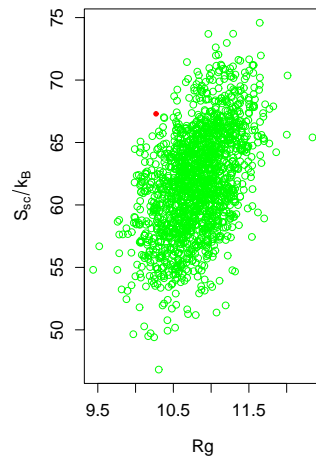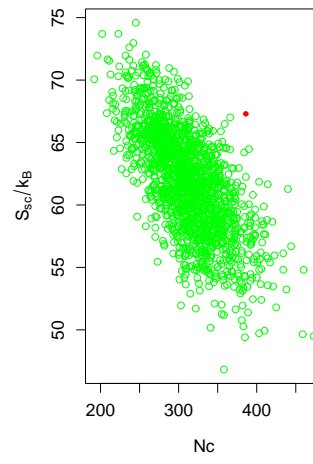

5. lmds

1ctf

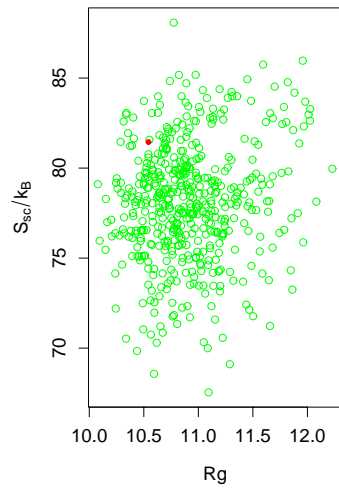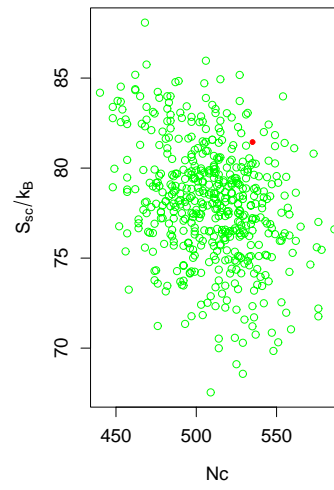

1fc2 (Protein interacting with another protein)

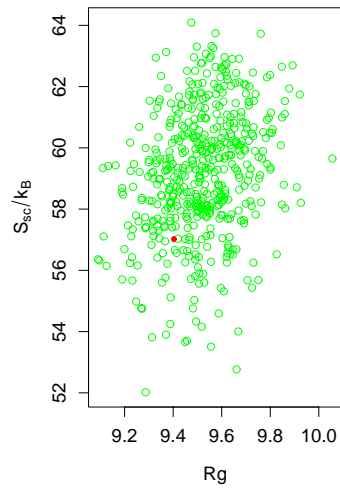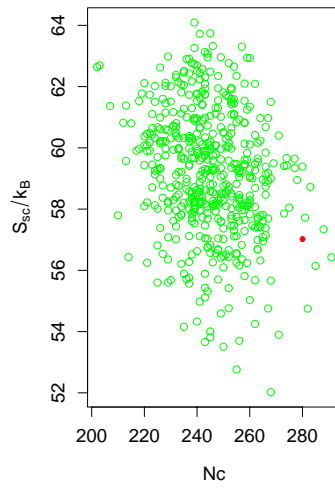

ligd

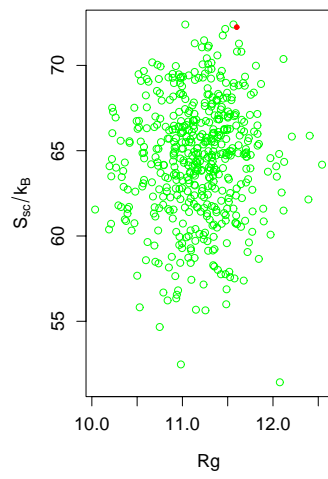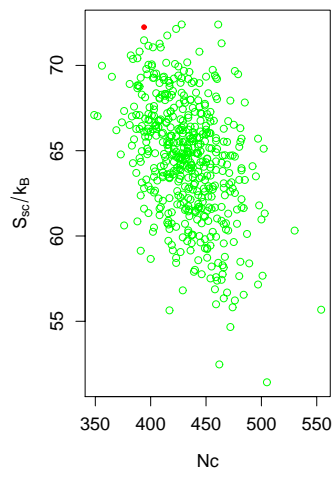

1shf-A

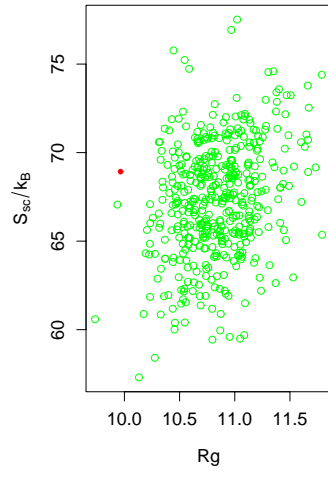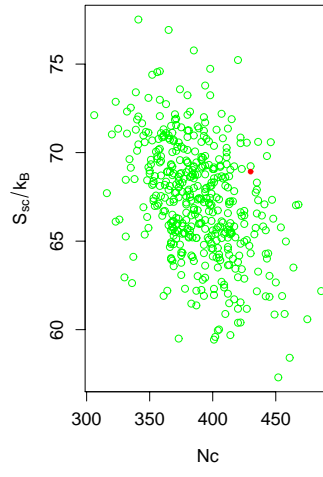

2cro

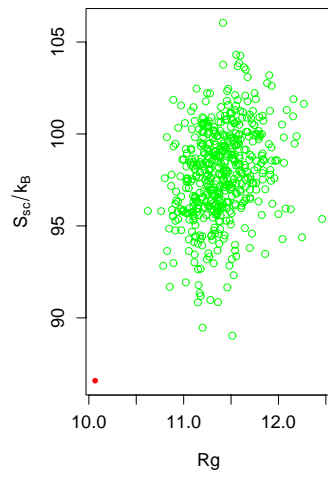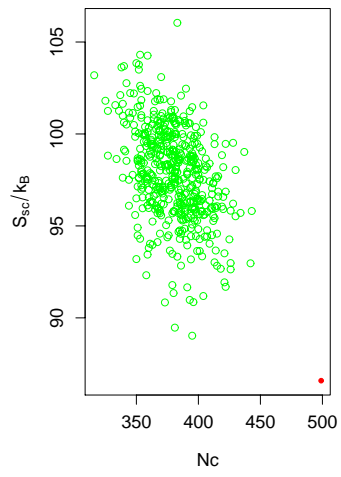

2ovo

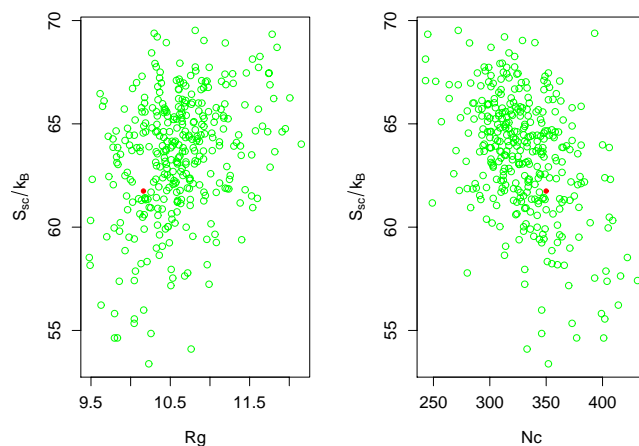

4pti (Protein with disulfide bonds)

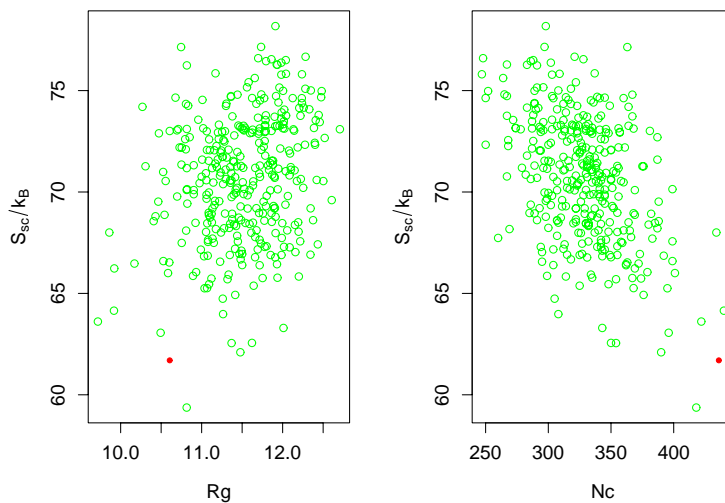

- II. Side-chain entropy versus number of contacts for X-ray structures and their decoys of protein-protein complexes generated by Rosetta program. Native complexes are represented by black dot and decoys empty squares. For some proteins (1bvk, 1cse, 1nmb, 2btf, 3hr), except native complex, all decoy structures have no self-avoiding conformations. Their figures are not shown.

1AVZ

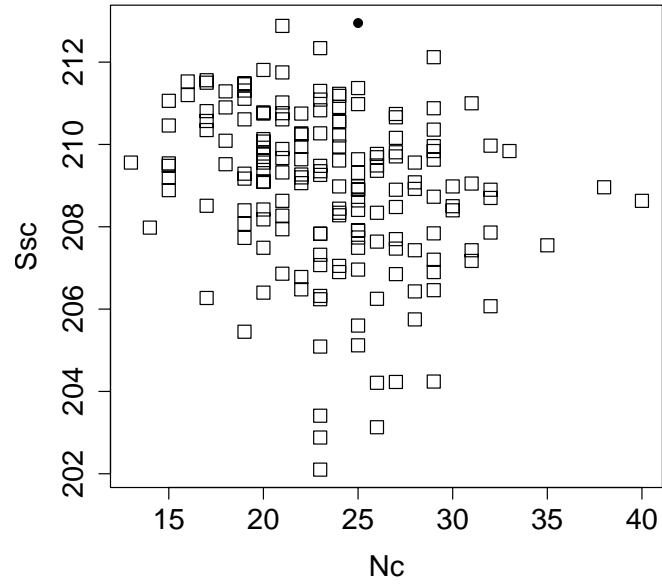

1BQL

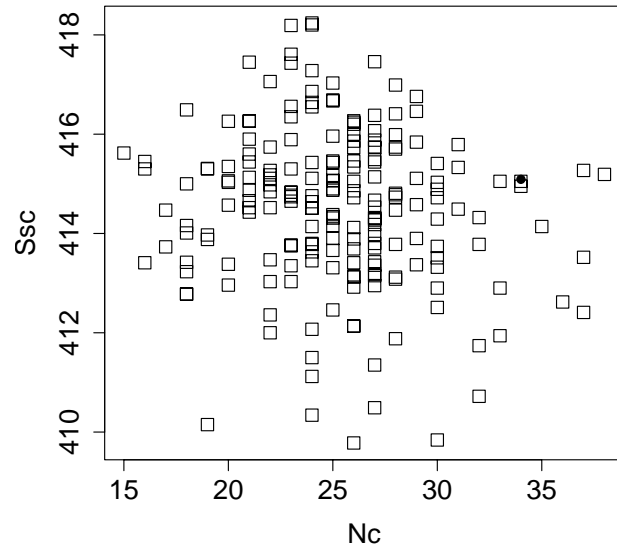

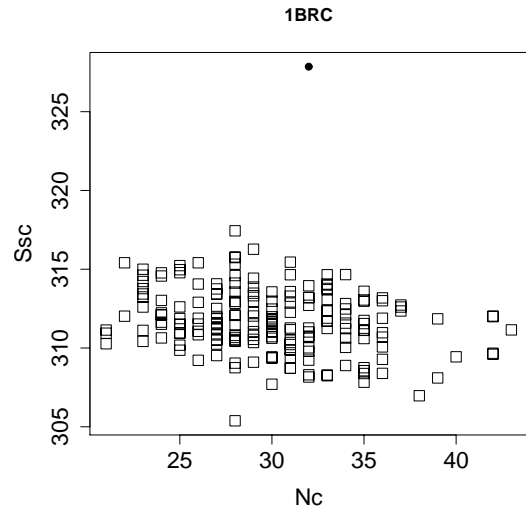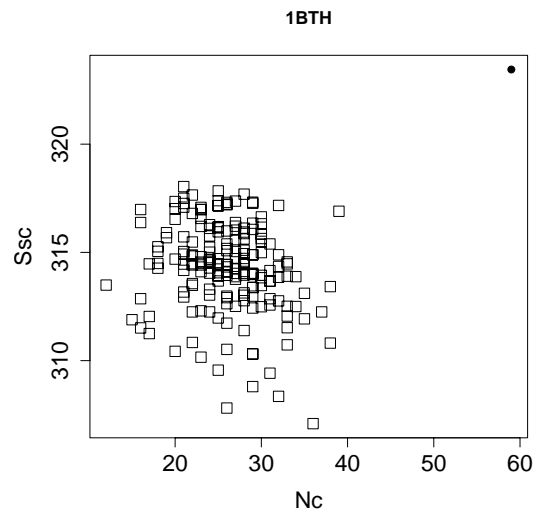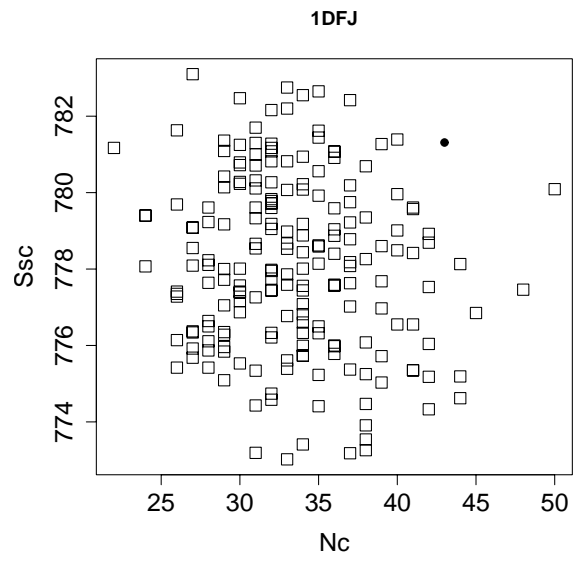

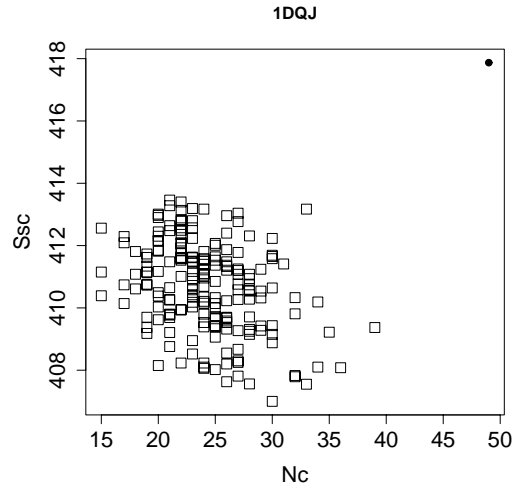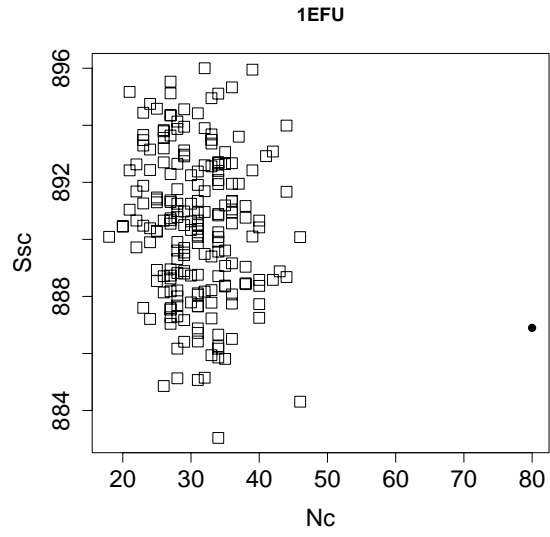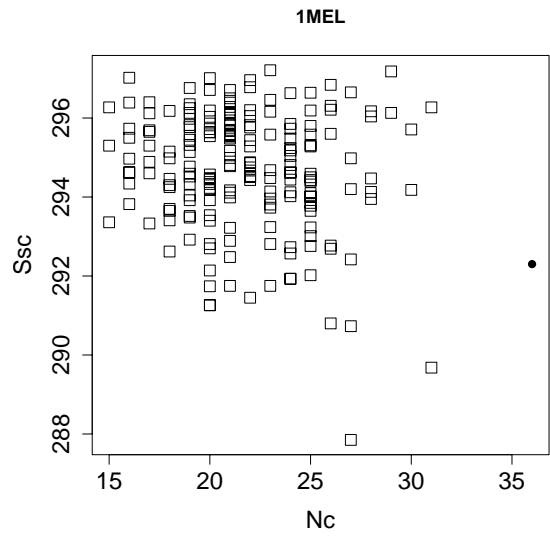



1PPE

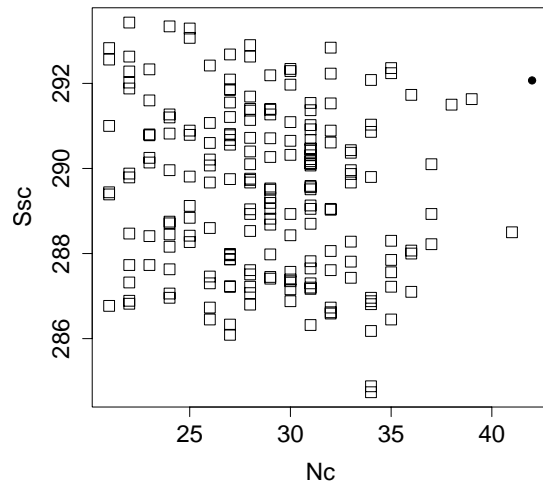

1SPB

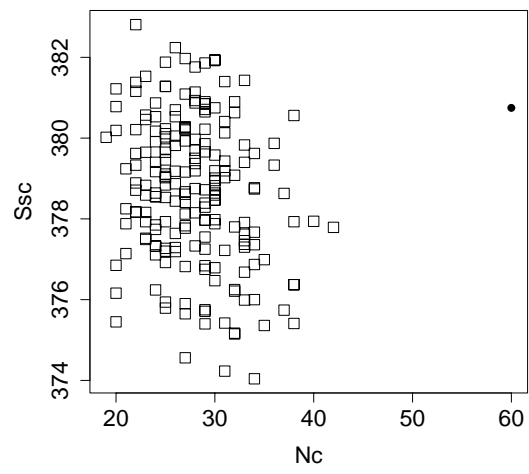

1WEJ

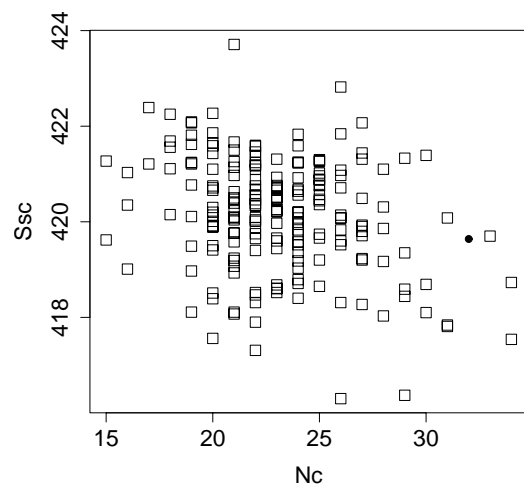

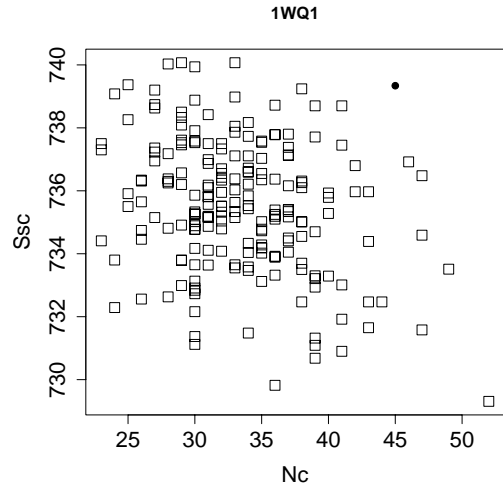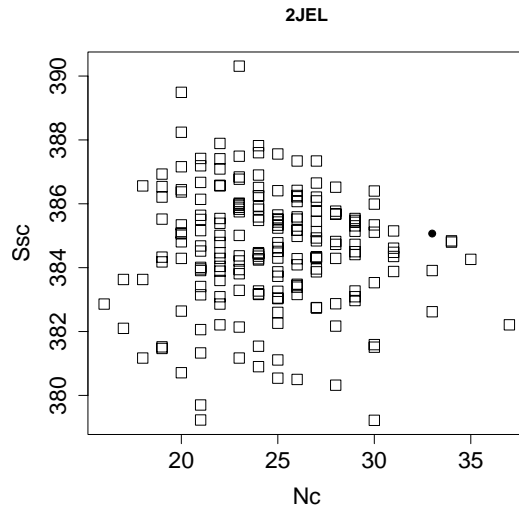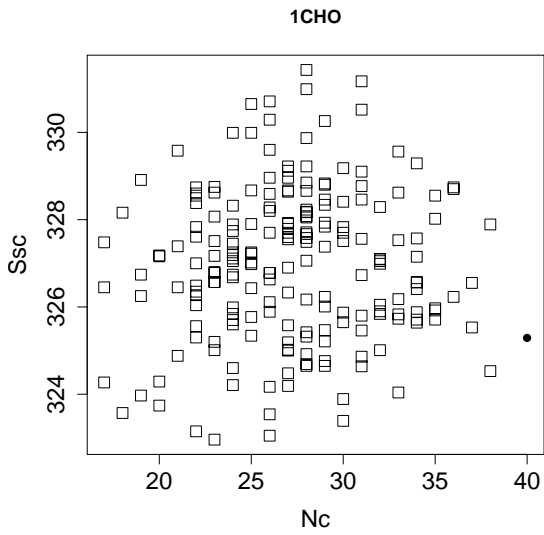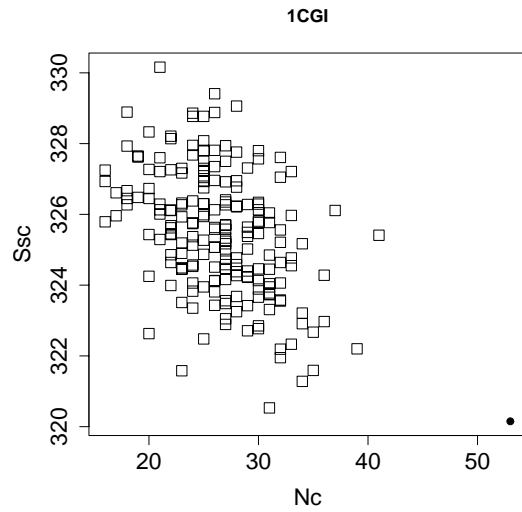

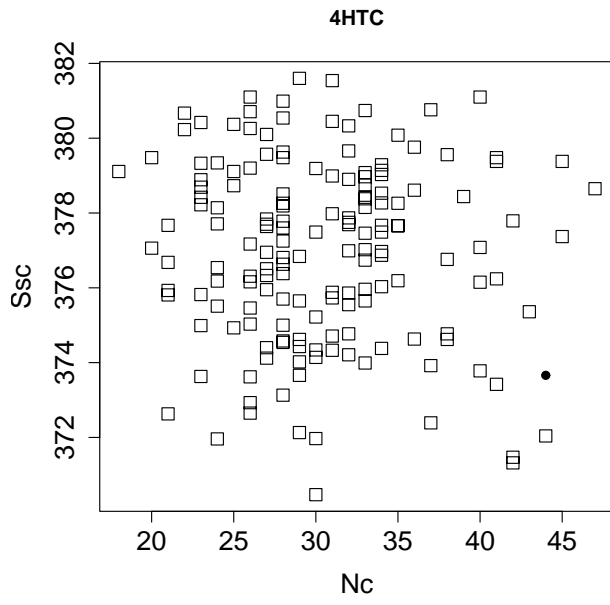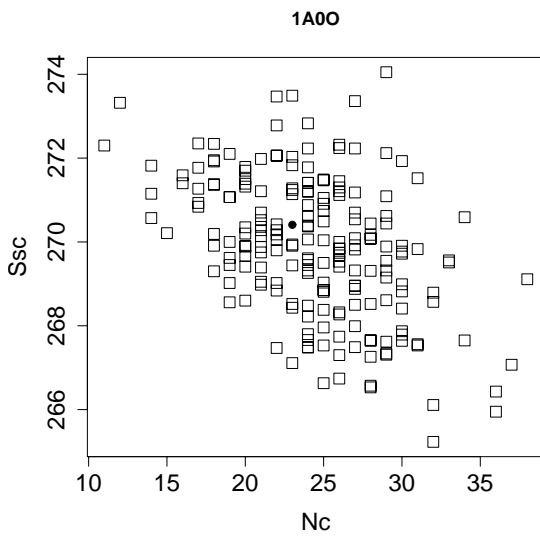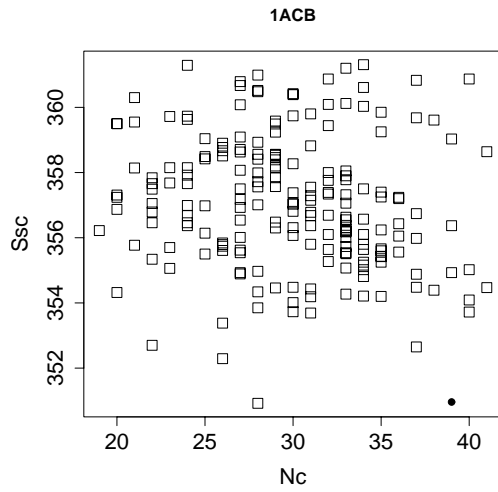

1AHW

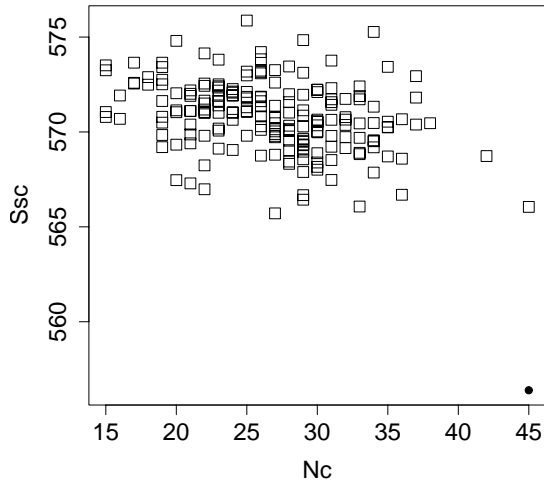

1ATN

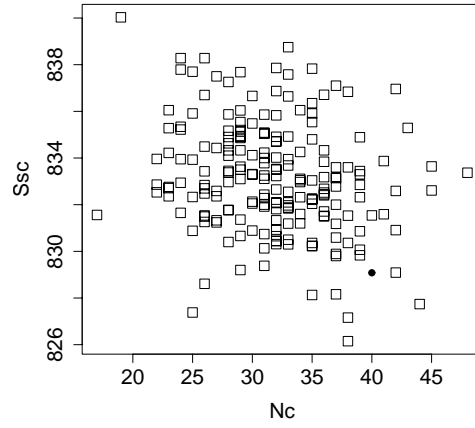

1EO8

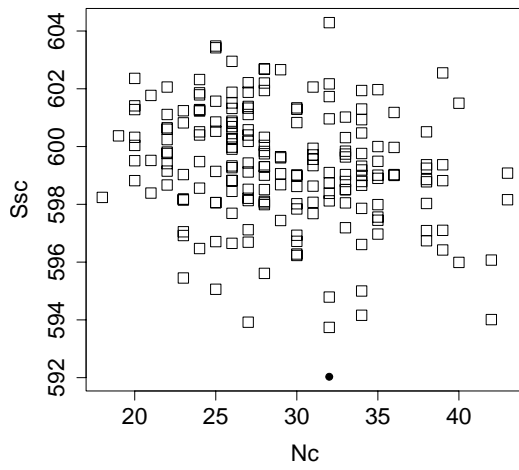

1MLC

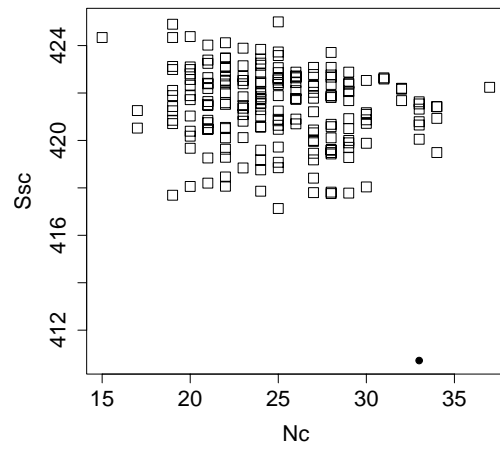

1QFU

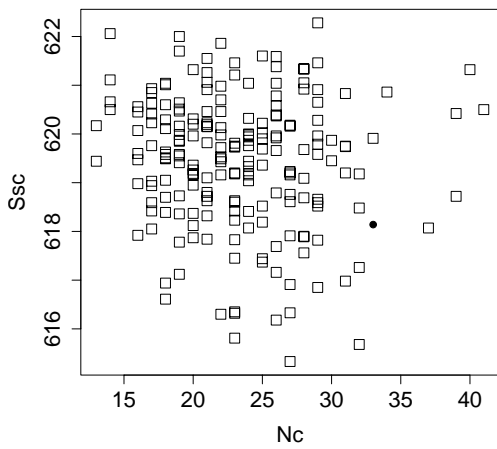

1STF

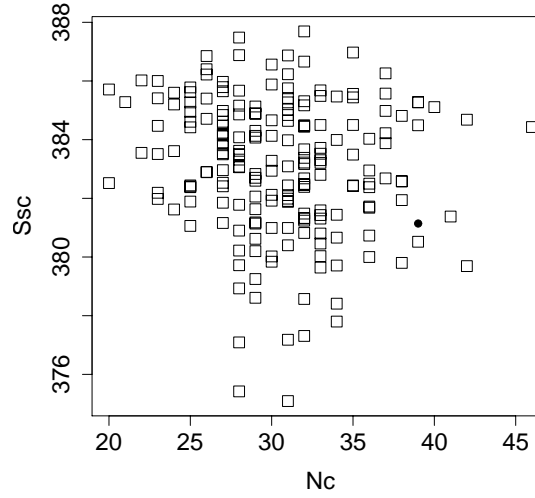

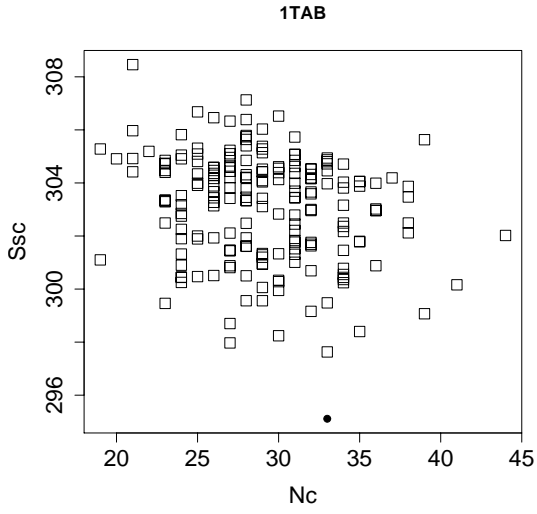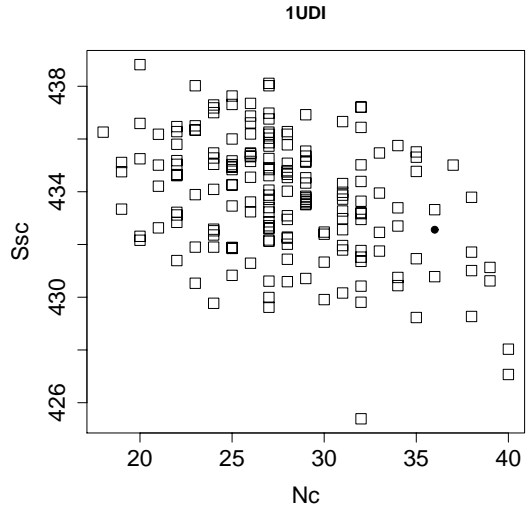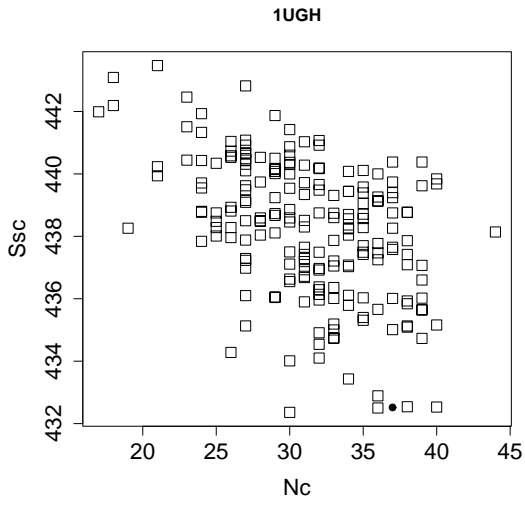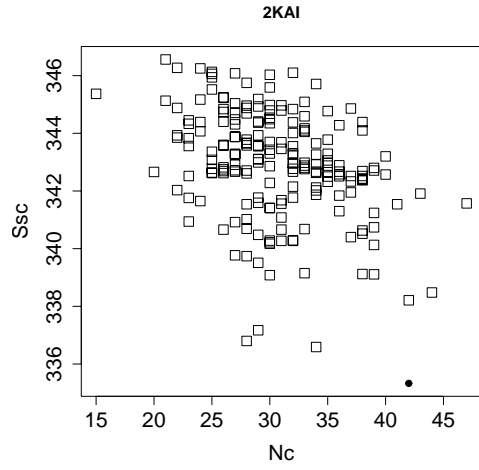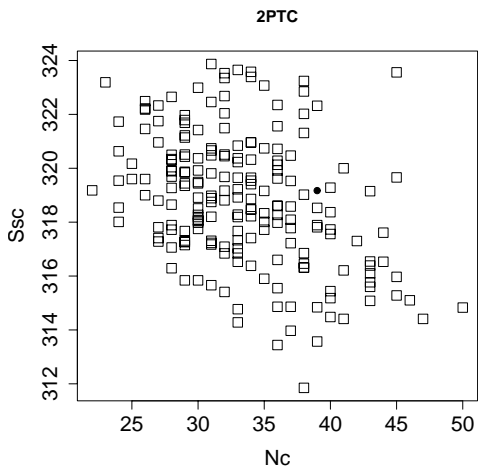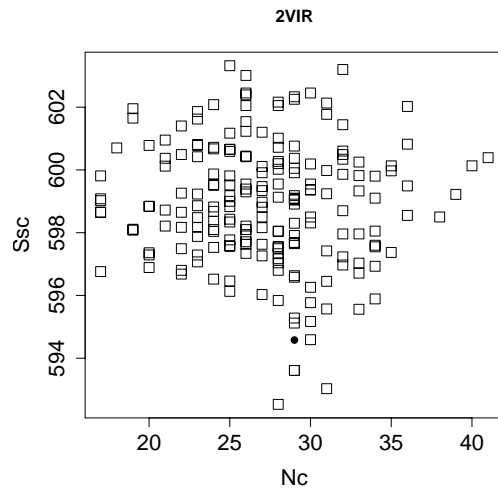

Supplement: pcbi.0020168.sd001.pdf [file pcbi.0020168.sd001.pdf]
